# Supplementary material for: The Many Faces of DFNB9: Relating OTOF Variants to Hearing Impairment
Source: Genes (Basel). 2020 Nov 26;11(12):1411. doi: 10.3390/genes11121411 (PMC7768390; doi:10.3390/genes11121411)
Supplement: Supplementary file 1 [file genes-11-01411-s001.xlsx]

## Sheet: OTOF NM_001287489
Table S1. Overview of pathogenic/likely pathogenic OTOF variants from literature and database review
c. position	p. position	Exon/Intron	Zygosity	Variant type	DVD	LOVD	ClinVar	Hearing loss onset	Hearing loss severity	Progressive	Audioprofile	Temperature senstitive hearing loss	Ethnicity/Nationality	Method of hearing rehabilitation	Reference PMID	Comment
c.650A>G	p.(Asp217Gly)	8	Compound het	Missense				NA	Mild	NA	NA	NA	South Asia	NA	31095577
c.709C>T	p.(Arg237*)	8	Hom	Nonsense	Pathogenic	Pathogenic	Pathogenic	NA	NA	NA	NA	NA	Middle East	NA	11483641
c.711-2A>G	p.?	IVS8	Hom	Splice site	Pathogenic	Pathogenic		NA	Severe to profound	NA	NA	NA	South Asia	NA	22575033
c.740G>A	p.(Ser247Asn)	9	Compound het	Missense				NA	Profound	NA	NA	No	South Asia	NA	31095577
c.765G>C	p.(Gln255His)	9	Compound het	Missense	Pathogenic	Pathogenic	Pathogenic	Early onset	Profound	NA	NA	NA	Europe/Italy	NA	18381613
c.765+1G>C	p.?	IVS9	Compound het	Splice site				Early onset	Profound	Stable	NA	No	South Asia/China	Cochlear implantation	26818607	DPOAE and CM are present
c.766-2A>G	p.?	IVS9		Splice site	Pathogenic		Pathogenic								No reference
c.791G>C	p.(Arg264Pro)	10		Missense		Likely pathogenic									No reference
c.828C>A	p.(Cys276*)	10		Nonsense	Likely pathogenic		Pathogenic								No reference
c.850_852del	p.(Lys284del)	10		Inframe deletion		Pathogenic									No reference
c.897+1G>T	p.?	IVS10	Hom	Splice site	Likely pathogenic			NA	Severe to Profound	NA	NA	NA	North America/USA	NA	25991456	Auditory neuropathy
c.897+5G>A	p.?	IVS10	Hom	Splice site	Pathogenic	Pathogenic	Pathogenic	Early onset	Profound	Stable	Flat	No	South Asia/Japan	NA	22575033
c.897-2T>A	p.?	IVS10	Hom	Splice site		Pathogenic		Early onset	profound	NA	NA	No	Europe/Italy	Cochlear implantation	20211493
c.986G>A	p.(Arg329His)	12		Missense		Pathogenic									No reference
c.1045+2T>G	p.?	IVS12		Splice site	Likely pathogenic		Likely pathogenic								No reference
ex. 13	p.?	13	Het	CNV				NA	NA	NA	NA	NA	South Asia/Korea	NA	26632695
c.1102G>A	p.(Gly368Arg)	13	Het	Missense	Pathogenic	Likely pathogenic		NA	NA	NA	NA	NA	South Asia/China	NA	21935370
c.1103_1104delGGinsC	p.(Gly368Alafs*2)	13	Hom	Frameshift	Pathogenic	Pathogenic		NA	NA	NA	NA	NA	South Asia/Pakistan	NA	19250381
c.1111G>C	p.(Gly371Arg)	13	Hom	Missense			Pathogenic	Early onset	Profound	NA	NA	NA	Siberian Altai Republic	NA	27082237
c.1172delA	p.(Lys391Argfs*31)	13	Hom	Frameshift	Likely pathogenic		Likely pathogenic	NA	Profound	NA	NA	NA	North America/USA	NA	25991456
c.1180dupG	p.(Glu394Glyfs*6)	13	Compound het	Frameshift	Pathogenic	Pathogenic	Pathogenic	Early onset	Profound	NA	NA	NA	Europe/Spain	NA	18381613
c.1194T>A	p.(Asp398Glu)	13	Het	Missense		Pathogenic	VUS	Late onset (19 yrs)	NA		NA	No	South Asia/China	NA	21935370, 20504331
c.1236delC	p.(Glu413Asnfs*9)	14	Compound het	Frameshift	Pathogenic	Pathogenic		Early onset	Profound	NA	NA	NA	Europe/Spain and South Asia/China	NA/Nothing in Chinese patient	18381613, 30065612	First case from Spain, second case from China
c.1273C>T	p.(Arg425*)	14	Hom	Nonsense	Pathogenic	Pathogenic	Pathogenic	NA	NA	NA	NA	NA	South Asia/Pakistan	NA	19250381
c.1274G>C	p.(Arg425Pro)	14	Hom	Missense				Early onset	Profound	NA	NA	NA	South Asia/China	NA	31250571
c.1292G>T	p.(Arg431Leu)	14	Het	Missense				NA	NA	NA	NA	NA	South Asia/Japan	NA	26346818
c.1348del	p.(Asp450Thrfs*46)	14	Het	Frameshift		Pathogenic									16371502
c.1350C>G	p.(Asp450Glu)	14	Het	Missense	Likely pathogenic	Pathogenic	VUS	Early onset	Severe	NA	NA	No	South Asia/Japan	NA	24053799
c.1392+1G>A	p.?	IVS14	Hom	Splice site	Pathogenic	Pathogenic		NA	Profound	NA	NA	NA	Middle East/Iran	NA	29484972
c.1392+1G>T	p.?	IVS14	Hom	Splice site				NA	NA	NA	NA	NA	Europe	NA	24498627
c.1422T>A	p.(Tyr474*)	15	Hom	Nonsense	Pathogenic	Pathogenic	Pathogenic	Early onset	Profound	Stable	Flat	No	South Asia/Japan	NA	22575033
c.1422T>G	p.(Tyr474*)	15	Hom	Nonsense				Congenital	Profound	NA	NA	NA	NA	NA	26969326
c.1465C>T	p.(Pro489Ser)	15	Hom	Missense				NA	Profound	NA	NA	NA	South Asia/Japan	NA	31095577
c.1469C>G	p.(Pro490Arg)	15	Hom	Missense			Pathogenic	NA	Profound	NA	NA	NA	Middle East/Oman	NA	27652356
c.1469C>A	p.(Pro490Gln)	15	Hom	Missense	Pathogenic	VUS	Pathogenic	Early onset	Profound	NA	NA	NA	Middle East/Turkey	NA	12127154
c.1469dupC	p.(Leu491Thrfs*26)	15	Hom	Frameshift				Early onset	NA	NA	NA	NA	South Asia/China	NA	27610647
c.1498C>T	p.(Arg500*)	15	Hom	Nonsense				NA	NA	NA	NA	NA	South Asia/Taiwan	NA	31581539
c.1538A>G	p.(His513Arg)	15	Compound het	Missense				NA	Severe	NA	NA	NA	South Asia/Japan	NA	31095577
c.1539_1554del16	p.(His513Glnfs*20)	15	Compound het	Frameshift				Early onset	Profound	Stable	NA	No	South Asia/China	Cochlear implantation	26818607
c.1544T>C	p.(Ile515Thr)	15	Hom	Missense	Pathogenic	Pathogenic		Early onset	Profound; Mild when afebrile/profound with fever	NA	NA	Yes	Middle East/Turkey; North America	NA	12127154, 12525542	South Asia, Turkey
c.1544_1546dup	p.Ile515_Asp516insVal	15		Inframe duplication		Pathogenic									No reference
c.1550T>C	p.(Leu517Pro)	15	Hom/compound het	Missense			Pathogenic	NA	Profound/Mild (compound het)	NA	NA	NA	South Asia/China	NA	30073893
c.1552_1567del16	p.(Arg518Thrfs*15)	15	Het	Frameshift	Pathogenic	Pathogenic	Pathogenic	NA	Severe to Profound	NA	NA	No	South America/Brazil	NA	19461658
c.1601delC	p.(Pro534Glnfs*4)	16	Compound het	Frameshift	Pathogenic	Pathogenic	Pathogenic	Early onset	Profound	NA	NA	NA	South America/Argentina	NA	18381613
c.1607G>A	p.(Trp536*)	16	Hom	Nonsense	Pathogenic	Pathogenic	Pathogenic	Early onset	Profound	NA	NA	NA	South Asia/Pakistan	NA	19250381
c.1609delG	p.(Val537*)	16	Compound het	Frameshift	Pathogenic		Pathogenic	Early onset	NA	NA	NA	NA	Europe	Cochlear implantation	19636622
c.1621G>A	p.(Gly541Ser)	16	Hom	Missense	Pathogenic	Pathogenic	Pathogenic	Early onset	Mild	Stable	Flat	Yes	South Asia/Japan	NA	22575033
c.1630C>T	p.(Arg544Cys)	16	Het	Missense		Pathogenic	VUS	Early onset	NA	NA	NA	NA	Europe/Germany	NA	27068579
c.1651delG	p.(Glu551Serfs*5)	16	Compound het	Frameshift	Pathogenic		Pathogenic	Early onset	Severe-Profound	NA	Bowl shaped	NA	North America/USA	NA	12525542
c.1694T>C	p.(Phe565Ser)	16		Missense		Pathogenic									No reference
c.1696C>T	p.(Arg566Trp)	16	Compound het	Missense				Congenital	Severe-Profound	NA	NA	NA	NA	NA	26969326
c.1702C>T	p.(Arg568Trp)	16	Compound het	Missense				Early onset	Profound	NA	NA	NA	South Asia/China	NA	30368385
c.1718T>G	p.(Leu573Arg)	16	Hom	Missense	Pathogenic	Pathogenic	Pathogenic	Early onset	Profound	NA	NA	NA	South Asia/Pakistan	NA	19250381
c.1740delC	p.(Ser581Profs*41)	16	Het	Frameshift	Pathogenic	Pathogenic		Early onset	NA	NA	NA	No	South Asia/China	NA	20504331
c.1780G>A	p.(Glu594Lys)	16	Het	Missense	Pathogenic	Pathogenic		Late onset (12 yrs)	NA	NA	NA	No	South Asia/China	NA	20504331
c.1841G>A	p.(Gly614Glu)	17	Compound het	Missense	Pathogenic	Pathogenic	Pathogenic	NA	Severe-Profound	NA	NA	NA	South America/Brazil	NA	19461658
c.1879G>T	p.(Gly627*)	17	Compound het	Nonsense				Congenital	NA	NA	NA	NA	NA	NA	26969326
c.1886dupA	p.(Pro630Alafs*5)	17	Compound het	Frameshift	Pathogenic	Pathogenic	Pathogenic	Congenital	Profound	Stable	Flat	No	North America/USA	NA	16371502
c.1890dup	p.(Ile631Hisfs*4)	17		Frameshift		Pathogenic									No reference
c.1904T>A	p.(Val635Asp)	17	Hom	Missense			Pathogenic	NA	NA	NA	NA	NA	South Asia/Pakistan	NA	30303587
c.1946_1965del20	p.(Arg649Profs*7)	18	Compound het	Frameshift	Pathogenic	Pathogenic	Pathogenic	Early onset	Unstable	Unstable	Steeply sloping	No	South Asia/Japan	NA	22575033
c.1958delC	p.(Pro653Leufs*13)	18	Hom	Frameshift	Pathogenic			NA	NA	NA	NA	NA	Middle East/Turkey	NA	21117948
c.1966delC	p.(Arg656Glyfs*10)	18	Compound het	Frameshift	Pathogenic		Pathogenic	Early onset	Profound	NA	NA	NA	Europe/Italy	Cochlear implantation	19636622
c.1981dupG	p.(Asp661Glyfs*2)	18	Hom	Frameshift	Pathogenic	Pathogenic		Early onset	Profound	NA	NA	NA	Middle East/Iran	NA	22906306
c.2093G>C	p.(Arg698Thr)	18	Compound het	Missense		Pathogenic		Early onset	Moderately severe	Fluctuant	NA	Yes	South Asia/China	Cochlear implantation	26818607
c.2093+1G>T	p.?	IVS18	Het	Splice site	Pathogenic			Early onset	Moderate to severe	NA	Rising	No	North America/USA	NA	16371502
c.2122C>T	p.(Arg708*)	19	Compound het	Nonsense	Pathogenic	Pathogenic	Pathogenic	Early onset	NA	NA	NA	NA	Europe/Spain	NA	14635104
c.2151G>A	p.(Trp717*)	19	Compound het	Nonsense	Pathogenic	Pathogenic		Early onset	Profound	NA	NA	No	South Asia/Japan	NA	24053799
c.2153G>A	p.(Trp718*)	19		Nonsense	Pathogenic	Pathogenic	Pathogenic								No reference
c.2154G>A	p.(Trp718*)	19		Nonsense		Pathogenic									No reference
c.2180A>G	p.(Asn727Ser)	19	Het	Missense		Likely pathogenic		Early onset	Severe/Profound	NA	NA	No	South Asia/Japan	NA	24053799	Two patients: one profound and second is severe
c.2214+1G>T	p.?	IVS19		Splice site	Pathogenic	Pathogenic	Pathogenic								12525542
c.2215-1G>C	p.?	IVS19	Compound het	Splice site				Early onset	Profound	Stable	NA	No	South Asia/China	Cochlear implantation	26818607
c.2239G>T	p.(Glu747*)	20	Hom	Nonsense	Pathogenic	Pathogenic	Pathogenic	Early onset	Profound	NA	NA	NA	North Africa/Libya	NA	18381613
c.2279T>C	p.(Leu760Pro)	20	Hom	Missense				NA	NA	NA	NA	NA	South Asia/Taiwan	NA	31581539
c.2296_2298del	p.(Glu766del)	20		Inframe deletion	Pathogenic	Pathogenic									No reference
c.2316C>A	p.(Cys772*)	21	Compound het	Nonsense	Pathogenic	Pathogenic	Pathogenic	Early onset	Moderate	NA	NA	NA	Europe/Italy	NA	20211493
c.2316-15_2316dup16	p.(Arg773Serfs*12)	21	Compound het	Frameshift		Pathogenic		Congenital	Profound	Stable	NA	NA	Europe/France	NA	29196752
c.2348delG	p.(Gly783Alafs*17)	21	Compound het	Frameshift	Pathogenic	Pathogenic	Pathogenic	Congenital	Profound	stable	Flat	No	North America/USA	NA	16371502
c.2372dup	p.(Asp791Glufs*102)	21		Frameshift	Likely pathogenic										No reference
c.2377G>T	p.(Glu793*)	21	Compound het	Nonsense				Early onset	Profound	Stable	NA	No	South Asia/China	NA	26818607
c.2381G>A	p.(Arg794His)	21	Het	Missense		Likely pathogenic	Likely benign/VUS	Early onset	Profound	NA	Corner	No	North America/USA	NA	16371502
c.2383delC	p.(Leu795Serfs*5)	21	Compound het	Frameshift				Early onset	Moderate	NA	Flat	Yes	South Asia	Cochlear implantation	26778470
c.2422C>T	p.(Gln808*)	22		Nonsense		Pathogenic									No reference
c.2485C>T	p.(Gln829*)	22	Hom	Nonsense	Pathogenic	Pathogenic	Pathogenic	Early onset	Profound	NA	NA	NA	Europe/Spain	Cochlear implantation	12114484, 14635104, 18381613	Most frequent variant in populations of Spanish descent, 14635104 (10 subjects with cochlear implant), 18381613 (15 subjects)
c.2521G>A	p.(Glu841Lys)	22	Compound het	Missense				NA	Profound	NA	NA	NA	South Asia/Korea	NA	26632695
c.2649C>A	p.(Cys883*)	23	Compound het	Nonsense	Pathogenic	Pathogenic	Pathogenic	Early onset	Profound	NA	NA	NA	Europe/Spain	NA	18381613
c.2684_2685delGG	p.(Gly895Glufs*106)	24	Compound het	Frameshift	Pathogenic	Pathogenic	Pathogenic	Early onset	Profound	NA	NA	NA	Europe/Spain	NA	18381613
c.2732_2735dupAGCT	p.(Tyr913Alafs*90)	24	Compound het	Frameshift	Pathogenic	Pathogenic		Early onset	Profound	NA	NA	NA	Europe/Italy	NA	18381613
c.2765G>T	p.(Arg922Leu)	24	Compound het	Missense				NA	NA	NA	NA	NA	NA	NA	26969326
c.2818C>T	p.(Gln940*)	24		Nonsense	Pathogenic		Pathogenic								No reference
c.2846C>A	p.(Pro949His)	24	Het	Missense				Early onset	NA	NA	NA	NA	NA	NA	27068579
c.2866+1G>A	p.?	IVS24	Hom	Splice site	Pathogenic			NA	NA	NA	NA	NA	Middle East/Israel (Druze)	NA	10878664
c.2872C>T	p.(Gln958*)	25	Compound het	Nonsense		Pathogenic		Congenital	Profound	NA	NA	NA	Europe/France	NA	29196752
c.2887C>T	p.(Arg963*)	25	Hom	Nonsense	Pathogenic		Pathogenic	NA	NA	NA	NA	NA	Europe	NA	16283880
c.2891C>A	p.(Ala964Glu)	25	Compound het	Missense	Pathogenic	Pathogenic	Pathogenic	Early onset	Profound	NA	NA	NA	Europe/Italy	NA	18381613
c.2894A>C	p.(His965Pro)	25		Missense		Pathogenic									No reference
c.2901C>G	p.(Tyr967*)	25	Compound het	Nonsense				Early onset	Profound	Stable	NA	No	South Asia/China	Cochlear implantation	26818607
c.2905_2923delinsCTCCGAGCGCA	p.(Ala969Leufs*30)	25	Compound het	Frameshift	Pathogenic	Pathogenic	Pathogenic	Early onset	Profound	NA	NA	No	South America/Argentina	NA	No reference
c.2919dupT	p.(Ala974Cysfs*28)	25	Compound het	Frameshift	Pathogenic			NA	NA	NA	NA	NA	North America/USA	NA	23525850
c.2965_2967delTTC	p.(Phe989del)	25	Hom	Inframe deletion				NA	Severe	Stable	NA	NA	South Asia/Pakistan	NA	27573290
c.2975_2978del	p.(Gln994Valfs*6)	25	Compound het	Frameshift		Pathogenic		Early onset	Severe-Profound	NA	NA	Yes	South Asia/China	NA	20504331
c.2977_2978delAG	p.(Gln994Valfs*7)	25	Compound het	Frameshift	Pathogenic							Yes	South Asia/China	NA	20504331
c.2991+1G>A	p.?	IVS25		Splice site	Pathogenic		Pathogenic								10878664
c.2991+2T>G	p.?	IVS25		Splice site	Pathogenic		Pathogenic								No reference
c.3007_3008delCT	p.(Leu1003Valfs*18)	26	Compound het	Frameshift				Early onset	Profound	NA	NA	No	South Asia/Japan	NA	31095577
c.3032T>C	p.(Leu1011Pro)	26	Hom	Missense	Pathogenic		Pathogenic	Early onset	Profound	NA	NA	NA	Middle East/Turkey	NA	16097006
c.3178del	p.(Ala1060Glnfs*86)	27		Frameshift	Pathogenic		Pathogenic								No reference
c.3192C>G	p.(Tyr1064*)	27	Het	Nonsense	Pathogenic	Pathogenic		NA	NA	NA	NA	NA	South Asia/Korea, Japan	NA	23562982, 26346818
c.3205T>G	p.(Phe1069Val)	27	Compound het	Missense				Early onset	Severe	NA	NA	NA	South Asia/Japan	NA	31095577
c.3214C>T	p.(Gln1072*)	27	Compound het	Nonsense				Early onset	Profound	NA	NA	NA	South Asia/Japan	NA	31095577	Two patients
c.3229C>T	p.(Gln1077*)	27		Nonsense		Pathogenic									No reference
c.3239G>C	p.(Arg1080Pro)	27	Compound het	Missense	Pathogenic	Pathogenic	Pathogenic	Early onset	mild when afebrile	NA	NA	Yes	South America/Brazil	NA	19461658
c.3256G>A	p.(Gly1086Arg)	27	Compound het	Missense		Pathogenic		Early onset	NA	NA	NA	NA	South Asia/Japan	NA	29688962
c.3263T>C	p.(Leu1088Pro)	27	Hom	Missense	Pathogenic	Pathogenic		Early onset	Profound	NA	NA	NA	Middle East/Iran	NA	22607986
c.3269C>A	p.(Ala1090Glu)	27	Hom	Missense	Pathogenic	Pathogenic		Early onset	Severe-Profound	NA	NA	NA	South Asia/Pakistan	NA	19250381
c.3289-1G>T	p.?	IVS27	Hom	Splice site				Early onset	Profound	NA	NA	NA	South Asia/Pakistan	NA	27573290
c.3321dupC	p.(Ile1108Hisfs*69)	28	Compound het	Frameshift				Early onset	Severe	Stable	NA	No	South Asia/China	Cochlear implantation	26818607
c.3376dupA	p.(Ile1126Asnfs*51)	28	NA	Frameshift			Pathogenic	NA	NA	NA	NA	NA	South Asia/Pakistan	NA	30303587
c.3399C>A	p.(Tyr1133*)	28	Compound het	Nonsense				Early onset	Profound	Stable	NA	No	South Asia/China	Cochlear implantation	26818607
c.3400C>T	p.(Arg1134*)	28	Compound het	Nonsense	Pathogenic	Pathogenic		Early onset	Profound	Stable	NA	NA	Europe/Italy	NA	18381613
c.3409-2A>C	p.?	IVS28	NA	Splice site	Pathogenic			NA	NA	NA	NA	NA	Europe/UK	NA	16371502
c.3413T>C	p.(Leu1138Pro)	29	Compound het	Missense	Pathogenic	Pathogenic		Early onset	Profound	NA	NA	NA	Europe/Austria/Germany	NA	18381613	Two families
c.3549_3550insAA	p.(Leu1184Asnfs*20)	29		Frameshift		Pathogenic									No reference
c.3570+1G>T	p.?	IVS29	Hom	Splice site	Pathogenic			Early onset	Profound	NA	NA	NA	Europe	NA	24135434
c.3570+2T>C	p.?	IVS29	Hom	Splice site	Pathogenic	Likely pathogenic		NA	NA	NA	NA	NA	South Asia/China	NA	21935370
c.3571-2A>C	p.?	IVS29		Splice site	Pathogenic		Pathogenic								12525542
c.3679C>T	p.(Arg1227*)	30	Hom	Nonsense	Pathogenic		Likely benign	Early onset	NA	NA	NA	NA	Middle East/Turkey	NA	26226137
c.3683G>T	p.(Arg1228Leu)	30	Hom	Missense				Early onset	NA	NA	NA	NA	South Asia/Japan	NA	23967202
c.3704_3719del16	p.(Asp1235Alafs*30)	30	Compound het	Frameshift	Pathogenic	Pathogenic		Early onset	Mild to profound	Unstable v shape	v shape	NA	Europe/Italy	NA	20211493
c.3864+2T>C	p.?	IVS31		Splice site		Pathogenic									No reference
c.3894+5G>C	p.?	IVS32	Hom	Splice site				Early onset	NA	NA	NA	NA	South Asia/China	NA	31581539
c.4030C>T	p.(Arg1344*)	34	Hom	Nonsense	Pathogenic	Pathogenic	Pathogenic	NA	NA	NA	NA	NA	South Asia/China	NA	31581539
c.4093del	p.(Leu1365*)	35		Nonsense		Pathogenic									No reference
c.4103C>G	p.(Ser1368*)	35	Het	Nonsense	Pathogenic	Pathogenic		Early onset	Profound	NA	NA	No	South Asia/Japan	NA	24053799
c.4157C>T	p.(Thr1386Ile)	35		Missense	Pathogenic	Pathogenic	Pathogenic								No reference
c.4225A>T	p.(Lys1409*)	35	Compound het	Nonsense	Pathogenic	Pathogenic		Early onset	Profound	NA	NA	NA	South Asia/China	NA	23767834
c.4227+1G>T	p.?	35	Compound het	Splice site	Pathogenic	Pathogenic	Pathogenic	Early onset	Profound	NA	NA	NA	Europe/Spain	NA	18381613
c.4228-1G>A	p.?	35		Splice site	Likely pathogenic		Pathogenic								No reference
c.4249_4250insG	p.(Ser1417Cysfs*4)	36	Hom	Frameshift				Early onset	Profound	NA	NA	NA	South Asia/India	NA	31875531
c.4275G>A	p.(Trp1425*)	36	Compound het	Nonsense	Pathogenic		Pathogenic	Early onset	NA	NA	NA	NA	Europe/Spain	NA	14635104
c.4343_4346dupGCAT	p.(Ile1449Metfs*41)	36	Compound het	Frameshift				NA	Profound	NA	NA	No	South Asia/Japan	NA	31095577
c.4351G>T	p.(Gly1451*)	36	Compound het	Nonsense	Pathogenic	Pathogenic	Pathogenic	Early onset	Profound	NA	NA	No	Europe/Germany	NA	18381613
c.4362+2T>G	p.?	IVS36	Compound het	Splice site	Pathogenic			Early onset	NA	NA	NA	No	Europe/Spain	NA	14635104
c.4387C>G	p.(Pro1463Ala)	37	Compound het	Missense				NA	NA	NA	NA	NA	Middle East/Saudi Arabia	NA	27766948
c.4417G>T	p.(Gly1473Cys)	37	Het	Missense	Pathogenic			Late onset	NA	NA	NA	NA	South Asia/Japan	NA	23967202
c.4467dupC	p.(Ile1490Hisfs*19)	37	Hom	Frameshift	Pathogenic		Association	Early onset	Severe-Profound	NA	Flat	NA	Middle East/Turkey	NA	24746455
c.4483C>T	p.(Arg1495*)	37	Compound het	Nonsense	Pathogenic		Pathogenic	Early onset	Profound	NA	NA	No	Europe/Germany	NA	18381613
c.4491T>A	p.(Tyr1497*)	37	Hom	Nonsense	Pathogenic	Pathogenic	Pathogenic	Early onset	Profound	NA	NA	NA	Middle East/Lebanon	NA	10192385
c.4493T>A	p.(Val1498Glu)	37	Compound het	Missense				Early onset	NA	Stable	NA	No	South Asia/China	Cochlear implantation	26818607
c.4500+2T>G	p.?	IVS37	NA	Splice site	Pathogenic		Pathogenic								No reference
c.4559G>A	p.(Arg1520Gln)	38	Compound het	Missense	Pathogenic	Pathogenic	Pathogenic	Early onset	Profound	NA	NA	NA	Europe/France	Hearing aid, no benefit	16226319
c.4669_4677delCTGACGGTG	p.(Leu1557_Val1559del)	39	Compound het	Inframe deletion				Early onset	Mild to profound	NA	Flat	NA	South Asia/China	NA	30073893
c.4718T>C	p.(Ile1573Thr)	39	Hom	Missense	Pathogenic		Association	NA	NA	Progressive	NA	No (personal communication)	Middle East/Turkey	NA	21117948
c.4747C>T	p.(Arg1583Cys)	39	Compound het	Missense			Pathogenic	Early onset	Profound	Stable	NA	No	South Asia/China	Cochlear implantation	26818607
c.4748G>A	p.(Arg1583His)	39	Compound het	Missense	Pathogenic	Pathogenic		Early onset	Profound	NA	NA	NA	South Asia/China	Hearing aid, no benefit	24001616
c.4799+1G>A	p.?	IVS39	NA	Splice site	Pathogenic		Pathogenic	NA	NA	NA	NA	NA	South Asia/Pakistan	NA	30303587
c.4799+1G>C	p.?	IVS39	Hom	Splice site			Pathogenic	Early onset	Profound	NA	Sloping	NA	North America/USA	NA	12525542
c.4799+1G>T	p.?	IVS39	Compound het	Splice site	Pathogenic			NA	NA	NA	NA	NA	South Asia/Korea	NA	24814232
c.4805G>T	p.(Gly1602Val)	40	Hom	Missense				NA	NA	NA	NA	NA	South Asia/Pakistan	NA	27573290
c.4809C>A	p.(Tyr1603*)	40		Nonsense	Pathogenic	Pathogenic	Pathogenic	NA	NA	NA	NA	NA	South Asia/Pakistan	NA	19250381
c.4809C>G	p.(Tyr1603*)	40		Nonsense	Pathogenic										No reference
c.4819C>T	p.(Arg1607Trp)	40	Compound het	Missense	Pathogenic	Pathogenic	Association	NA	NA	NA	NA	Yes	South Asia/China	NA	20504331
c.4835C>T	p.(Pro1612Leu)	40		Missense	Likely pathogenic										No reference
c.4960G>C	p.(Gly1654Arg)	40	Compound het	Missense				NA	NA	NA	NA	NA	North America/USA	NA	23525850
c.4960G>A	p.(Gly1654Ser)	40	Compound het	Missense	Pathogenic	Pathogenic		NA	NA	NA	NA	NA	South America/Brazil	NA	19461658
c.4960+2T>C	p.?	IVS40	Hom	Splice site				NA	Profound	NA	NA	NA	South Asia/Japan	NA	31095577
c.4960+1G>C	p.?	IVS40	Hom	Splice site	Pathogenic		Pathogenic	Early onset	Profound	NA	Sloping	NA	North America/USA	NA	12525542
c.4961-3C>G	p.?	IVS40	Compound het	Splice site	Pathogenic			NA	NA	NA	NA	NA	South Asia/China	NA	23767834
c.4961-1G>A	p.?	IVS40	Hom	Splice site				NA	NA	NA	NA	NA	South Asia/Taiwan	NA	31581539
c.4981G>A	p.(Glu1661Lys)	41	Compound het	Missense				Early onset	Moderately severe	Fluctuant	NA	Yes	South Asia/China	Cochlear implantation	26818607
c.4994T>C	p.(Leu1665Pro)	41	Compound het	Missense				Early onset	Profound	NA	Flat	NA	South Asia/China	NA	28335750
c.5011dupT	p.(Trp1671Leufs*73)	41	Compound het	Frameshift	Pathogenic	Pathogenic	Pathogenic	Early onset	Profound	NA	NA	NA	Europe/Spain	NA	18381613
c.5026C>T	p.(Arg1676Cys)	41		Missense		Likely pathogenic	Benign/likely benign								No reference
c.5098G>C	p.(Glu1700Gln)	41	Hom/het	Missense	Pathogenic		VUS/pathogenic	Early onset	Mild/Profound	Progressive	Flat	NA	South Asia/China, Taiwan	Limited benefit from hearing aid (6), CI in 3 patients with good performance	20224275	Four families hom and one family het
c.5193-1G>A	p.?	IVS41		Splice site	Likely pathogenic		Likely pathogenic								No reference
c.5197G>A	p.(Glu1733Lys)	43	Hom	Missense	Pathogenic	Pathogenic	Pathogenic	NA	NA	NA	NA	NA	South Asia/Pakistan	NA	19250381
c.5203C>T	p.(Arg1735Trp)	43	Hom	Missense				NA	NA	NA	NA	NA	South Asia/Taiwan	NA	31581539
c.5203del	p.(Arg1735Glyfs*28)	43		Frameshift	Pathogenic		Pathogenic								No reference
c.5217G>A	p.(Trp1739*)	43	Compound het	Nonsense				Early onset	Profound	NA	NA	NA	Europe	Cochlear implantation and hearing aid	26188103
c.5248G>C	p.(Asp1750His)	43	Compound het	Missense				Early onset	Profound	NA	NA	NA	South Asia/China	Hearing aid, no profit	31827501
c.5330A>G	p.(Asp1777Gly)	44	Compound het	Missense				Early onset	Profound	Stable	NA	No	South Asia/China	cochlear implantation	26818607
c.5332G>A	p.(Val1778Ile)	44	Het	Missense	Likely pathogenic	Pathogenic	Likely pathogenic	NA	Profound	NA	NA	No	South Asia/Japan	NA	24053799
c.5332G>T	p.(Val1778Phe)	44	Hom	Missense	Likely pathogenic		Likely pathogenic	Early onset	Mild to moderate	NA	NA	NA	Europe/Hungarian, Romanian	Cochlear implant and hearing aid	27621663
c.5335C>T	p.(His1779Tyr)	44	Hom	Missense				NA	NA	NA	NA	NA	South Asia/China	NA	31581539
c.5375G>A	p.(Arg1792His)	44	Compound het	Missense	Likely pathogenic		Likely pathogenic	NA	profound	NA	NA	NA	South Asia/Japan	NA	27124789
c.5384T>G	p.(Phe1795Cys)	44	Hom	Missense	Pathogenic	Pathogenic	Pathogenic	Early onset	Profound	NA	NA	No	Europe/Italy	NA	18381613
c.5408A>C	p.(Glu1803Ala)	44	Het	Missense	Likely pathogenic	Pathogenic		Early onset	Profound	NA	NA	No	South Asia/Japan	NA	24053799
c.5410_5412delGAG	p.(Glu1804del)	44	Hom	Inframe deletion	Pathogenic			Early onset	Mild	Fluctuant	Flat	Yes	Europe/Scotland	NA	20230791	HL increased immendiately with an elevated body temperature (fever) of 1°C, and it disappeared with return to normal body temperature
c.5431A>T	p.(Lys1811*)	44	Het	Nonsense	Pathogenic	Pathogenic		NA	NA	NA	NA	NA	South America/Brazil	Cochlear implantation	19461658
c.5466C>G	p.(Tyr1822*)	44	Compound het	Nonsense	Pathogenic	Pathogenic	Pathogenic	Early onset	Profound	stable	Flat	No	South Asia/Japan	NA	22575033
c.5473C>G	p.(Pro1825Ala)	44	Het	Missense	Pathogenic		Pathogenic	Early onset	Profound	NA	NA	NA	Europe/Spain	NA	12114484
c.5524G>A	p.(Asp1842Asn)	44	Het	Missense	Pathogenic			Early onset	Moderate	Stable	Flat	No	South Asia/Japan	NA	22575033
c.5500G>A	p.(Asp1834Asn)	45		Missense		Likely pathogenic									No reference
c.5534G>A	p.(Gly1845Glu)	45	Compound het	Missense				NA	NA	NA	NA	NA	South Asia/Korea	NA	30482216
c.5566C>T	p.(Arg1856Trp)	45	Compound het	Missense	Pathogenic		VUS	NA	NA	NA	NA	NA	South Asia/Korea	NA	26445815
c.5567G>A	p.(Arg1856Gln)	45	Hom	Missense	Pathogenic	Pathogenic	Pathogenic	Early onset	NA	NA	NA	NA	South Asia/Pakistan	NA	19250381
c.5575_5576delAA	p.(Lys1859Aspfs*38)	45		Frameshift	Likely pathogenic		Likely pathogenic								26969326
c.5636C>A	p.(Ser1879Tyr)	45		Missense		Pathogenic									No reference
c.5647C>T	p.(Gln1883*)	45	Compound het	Nonsense	Pathogenic	Pathogenic		Early onset	Profound	NA	NA	NA	Europe/Italy	Hearing aid, no benefit	24001616
c.5666G>C	p.(Trp1889Ser)	45	Compound het	Missense				Early onset	Profound	Stable	NA	No	South Asia/China	Cochlear implantation	26818607
c.5669G>A	p.(Trp1890*)	45	Hom	Nonsense				NA	NA	NA	NA	NA	South Asia/India	NA	27344577
c.5712+1G>A	p.?	IVS45	Compound het	Splice site	Pathogenic	Pathogenic	Pathogenic	Early onset	Profound	NA	NA	NA	Europe/France	Cochlear implantation	16226319
c.5713-2A>G	p.?	IVS45	Het	Splice site	Pathogenic			Early onset	Profound	Stable	Flat	No	South Asia/Japan	NA	22575033
c.5714G>T	p.(Gly1905Val)	46	Hom	Missense			Pathogenic	NA	NA	NA	NA	NA	South Asia/Pakistan	NA	30303587
c.5785A>C	p.(Asn1929His)	46	Compound het	Missense	Pathogenic	Pathogenic		NA	NA	NA	NA	NA	South America/Brazil	NA	19461658
c.5791C>A	p.(Pro1931Thr)	46	Het	Missense				NA	Profound	NA	NA	No	South Asia/Korea	NA	30482216
c.5800dupC	p.(Leu1934Profs*251)	46	Compound het	Frameshift	Pathogenic	Pathogenic	Pathogenic	Early onset	Profound	NA	NA	No	Europe/Spain	NA	18381613
c.5815C>T	p.(Arg1939Trp)	48	Hom	Missense	Pathogenic	Pathogenic	VUS	NA	NA	NA	NA	NA	South Asia/Pakistan	NA	19250381
c.5816G>A	p.(Arg1939Gln)	48	Compound het	Missense	Pathogenic	Pathogenic	Pathogenic	Early onset	Variable	No/yes	Flat/steeply sloping	No	South Asia/Japan	NA	22575033	Variants in compound heterozygosity (variable severity), one patient from Japan with progressive hearing loss Japan (22575033) and as c.3515G>A in NM_194323 in ref 26346818
c.5833delA	p.(Ile1945Serfs*4)	48	Compound het	Frameshift				Early onset	Profound	Stable	NA	No	South Asia/China	Cochlear implantation	26818607
c.5900_5902delTCA	p.(Leu1967_Lys1968delinsGln)	48	Compound het	Inframe deletion				Early onset	Mild	NA	Flat		South Asia/China	Cochlear implantation	30073893
c.5925del	p.(Leu1976Cysfs*89)	47		Frameshift	Likely pathogenic		Likely pathogenic								No reference
c.5960C>G	p.(Pro1987Arg)	48	Hom	Missense	Pathogenic			Early onset	Severe-Profound	NA	Bowl shaped	NA	North America/USA	NA	12525542
c.5992T>C	p.(Term1998Arg)	48	Compound het	Stop loss	Pathogenic	Pathogenic	Pathogenic	Early onset	Moderate	Progressive	Steeply sloping for R, gently sloping for L	No	South Asia/Japan	NA	22575033
c.*20G>A	p.?	3' UTR		Regulatory		Pathogenic									No reference
~22kb incl ex. 16-47 & part ex. 48	p.?	16-48	Hom	CNV				NA	NA	NA	NA	NA	North America/USA	NA	23897863
52.8-61.6 kb	p.?	IVS18	Het	CNV				NA	NA	NA	NA	NA	Europe/Italy	NA	20211493
c.-127-?_2214+?del	p.?	IVS18	Compound het	Frameshift		Pathogenic		Early onset	Mild to moderate	NA	NA	NA	Europe/Italy	Cochlear implantation	20211493
Abbreviations: CNV, copy number variation; comp het, compound heterozygous; DPOAE, distortion product otoacoustic emissions; ex., exon; het, heterozygous; HL, hearing loss; hom, homozygous; NA, not ascertained
Note: Variants were adjusted to transcript NM_001287489.1 so they may not match historacal c. and p. positions in the literature or database submissions; zygosity was not always curated in database entries; some variants were only identified in heterozygosity
